# Supplementary material
Source: PubMed Central journal article supplement (PMC5723207)
Supplement: NIHMS885299-supplement-supplement_1.pdf [file NIHMS885299-supplement-supplement_1.pdf]

**Supplemental Methods.**

AD severity was assessed using the EASI (4 signs [erythema, excoriation, edema/papulation, lichenification] on 4 body sites; score-range=0-72)<sup>3</sup>, SCORAD (6 signs [erythema, excoriation, edema/papulation, oozing/crusting, lichenification, dryness] for a representative lesion, surface area assessed on 8 body sites, pruritus and sleeplessness; score-range=0-103), and objective-SCORAD (oSCORAD) (6 signs [erythema, excoriation, edema/papulation, oozing/crusting, lichenification, dryness] on 8 body sites, no symptoms; score-range=0-83)<sup>4</sup>, and Patient Oriented Eczema Measure (POEM) (7 symptoms; score-range=0-28). For oSCORAD/SCORAD, a representative lesion of most of the patient's eczema was selected for assessment of lesional intensity, but not the worst or best-looking lesion. POEM is the recommended core outcome instrument for capturing patient-reported symptoms by the Harmonizing Outcome Measures in Eczema (HOME) group<sup>7</sup>. POEM took <1-7 minutes to complete (mean=1.2 minutes). We did not formally record the time it took to administer EASI and oSCORAD/SCORAD. EASI and oSCORAD generally took 2-7 and 3-8 minutes, respectively, with an additional 1 minute for assessment of symptoms in SCORAD.
